# Supplementary material for: Both telomeric and non-telomeric DNA damage are determinants of mammalian cellular senescence
Source: PubMed Central journal article supplement (PMC2584625; doi:10.1186/1756-8935-1-6), 2008-11-03

**A**

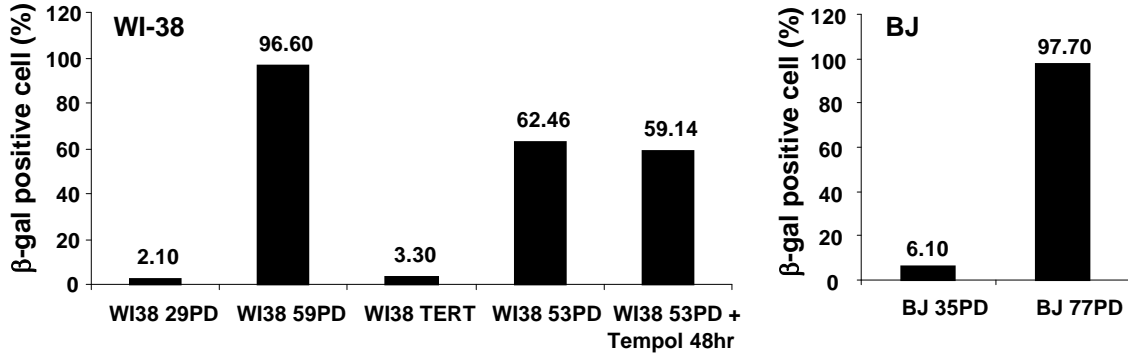

**B**

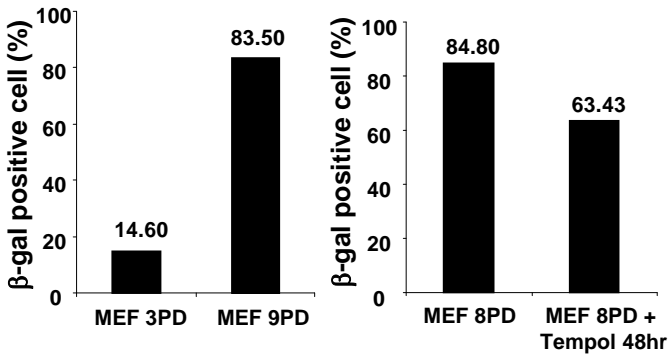

**C**

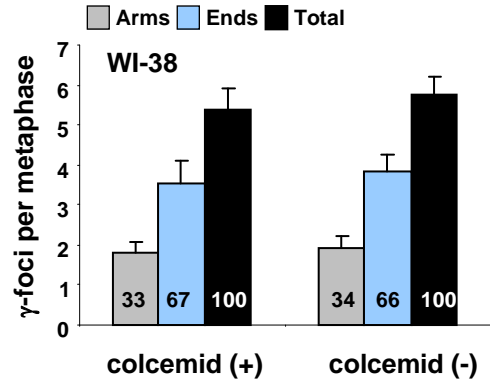

Supplement: 1756-8935-1-6-S2.pdf [file 1756-8935-1-6-S2.pdf]
